# Supplementary material for: Experimental and In Silico Modelling Analyses of the Gene Expression Pathway for Recombinant Antibody and By-Product Production in NS0 Cell Lines
Source: PLoS One. 2012 Oct 10;7(10):e47422. doi: 10.1371/journal.pone.0047422 (PMC3468484; doi:10.1371/journal.pone.0047422)
Supplement: File S5 — Raw data used for model construction and validation. (XLS) [file pone.0047422.s005.xls]

## Sheet: Sheet1
		2N2 N1	2N2 N2	2N2 N3	Mean 2N2	StDev 2N2	2P N1	2P N2	2P N3	Mean 2P	StDev2P	4O N1	4O N2	4O N3	Mean 4O	StDev 4O	4R N1	4R N2	4R N3	Mean 4R	StDev4R	2X N1	2X N2	2X N3	Mean 2X	StDev 2X
S1	H.RNA	1065.8	477.877	799.248	780.975	294.388	293.383	275.213	181.394	249.997	48.5528	24.4316	62.6413	124.44	70.5042	50.4655	114.988	152.032	143.565	136.862	19.4107	78.1894	117.242	105.427	100.286	20.0273
S2	L.RNA	100750	25662.9	55421.2	60611.4	37811.6		39027.8	43301.3	41164.5	2136.71	325.658	289.489	1609.11	741.418	751.659	239.531	992.645	417.5	549.892	393.625	8532.37	1148.98		4840.67	5220.84
k2	HC mRNA turnover	ND	ND				0.7487	0.114	0.345	0.402567		ND	0.038				0.066	0.02				NM	NM	NM
k4	[LC mRNA Turnover]	ND	ND				0.171	0.046	ND	0.1085		0.026	ND				0.041	0.011				NM	NM	NM
S3	H	ND	8.53428e+06	1.04092e+06	4.7876e+06	5.2986e+06	ND	2.49019e+06	ND	2.49019e+06		ND	ND	ND			2.22945e+06	2.44975e+06	ND	2.3396e+06	155777	3.00446e+06	5.47581e+06	4.19062e+06	4.22363e+06	908771
S4	L	1.81174e+06	1.59817e+06		1.70495e+06	151016	1.35694e+06	1.49127e+06		1.4241e+06	94988.5		1.07027e+06		1.07027e+06		1.42153e+06			1.42153e+06		2.73194e+06	1.68102e+06	1.71336e+06	2.04211e+06	743107
S6	LL	1.41707e+06	1.03014e+06	1.15699e+06	1.2014e+06	197251	785798	806511	795748	796019	10359.4	613142	507796	926172	682370	217609	623407	535786	239142	466112	201385	ND	ND	ND
S8	HL	6.69407e+07	3.9355e+08	2.44146e+07	1.61635e+08	2.01967e+08	5.74125e+07	7.49361e+07	3.79785e+07	5.67757e+07	3.1884e+07	8.48292e+06	9.59518e+06	2.37462e+07	1.39414e+07	8.50939e+06	ND	ND	ND			7.56662e+06	5.70372e+06	8.48589e+06	7.25208e+06	1.41751e+06
S12	LHHL	1.444e+07	1.32521e+07	8.334e+06	1.20087e+07	3.23732e+06	2.36945e+06	3.38426e+06	2.12024e+06	2.62465e+06	889639	1.15794e+06	1.8312e+06	1.26334e+06	1.4175e+06	362135	3.5433e+06	2.72569e+06	768517	2.34584e+06	1.42586e+06	3.65299e+06	2.93637e+06	4.45837e+06	3.68258e+06	761430
k11	[LC Turnover/secretion] qMab	3.12034e+07	4.25796e+07		3.68915e+07	8.04417e+06	888069	2.28725e+06		1.58766e+06	989368	459134	368068		413601	64393.6						2.0319e+06	2.93902e+06	1.56995e+06	2.18029e+06	641430
k13	[LL Turnover/secretion] qMab	1.382e+07	1.0824e+07		1.2322e+07	2.11849e+06	654940	1.43533e+06		1.04513e+06	551816	182201	80317.3		131259	72042.5						6.0876e+06	1.53979e+06	1.89014e+06	3.17251e+06	3.21578e+06
k18	[LHHL secretion/turnover] qMab	3.98032e+06	1.751e+06		2.86566e+06	1.57637e+06	172700	651130		411915	338301	123656	81793.7		102725	29600.8	64264.1	39160.8		51712.5	17750.7	1.00911e+06	643647	1.1687e+06	940487	258424
k15	[HL Turnover/secretion] qMab	1.40856e+07	8.81089e+06		1.14482e+07	3.72976e+06	581019	771972		676496	135024	110867	79593.1		95229.8	22113.6						1.24984e+06	878132	457174	861715	262836
S9	HL(Medium)	7.45667e+07	1.24785e+08	8.10209e+07	9.34576e+07	2.73218e+07	6.16867e+06	1.23608e+07	1.24199e+07	1.03165e+07	3.59221e+06	2.61888e+06	5.93773e+06	6.17512e+06	4.91058e+06	1.98821e+06	ND	ND	ND			8.00269e+06	7.88687e+06	1.46133e+07	1.01676e+07	3.85052e+06
S13	LHHL(Medium)	2.75968e+07	3.15367e+07	1.66188e+07	2.52508e+07	7.73069e+06	5.95188e+06	4.15255e+06	4.70912e+06	4.93785e+06	921212	3.46502e+06	2.73005e+06	7.85623e+06	4.68377e+06	2.7719e+06	1.32449e+06	3.89705e+06	2.87161e+06	2.69772e+06	1.29507e+06	5.57897e+06	5.97444e+06	5.09129e+06	5.54823e+06	442375
S5	L(Medium)	ND	4.05469e+07	9.25408e+07	6.65439e+07	3.67652e+07	3.70929e+06	2.80858e+07	4.25743e+07	2.47898e+07	1.9641e+07	6.39065e+06	8.67254e+06	1.35949e+07	9.55271e+06	3.68191e+06	ND	ND	ND			3.90408e+06	3.3955e+06	3.20261e+06	3.50073e+06	136395
S7	LL(Medium)	3.60353e+07	7.00363e+07	1.56543e+07	4.05753e+07	2.74738e+07	1.09937e+07	1.44608e+07	1.97951e+07	1.50832e+07	4.43358e+06	4.58838e+06	8.18011e+06	2.35833e+07	1.21173e+07	1.0091e+07	ND	ND	ND			9.2064e+06	6.29656e+06	9.21667e+06	8.23988e+06	1.68297e+06
	Cell Line	2N2 N1	2N2 N2	2N2 N3	2N2 N4	2N2 N5	2N2 N6	2N2 N7	2N2 N8	2N2 N9	Mean 2N2	St Dev 2N2	2P N1	2P N2	2P N3	2P N4	2P N5	2P N6	2P N7	2P N8	2P N9	Mean 2P	St Dev 2P	4O N1	4O N2	4O N3	4O N4	4O N5	4O N6	4O N7	4O N8	4O N9	Mean 4O	St Dev 4O	4R N1	4R N2	4R N3	4R N4	4R N5	4R N6	4R N7	4R N8	4R N9	Mean 4R	St Dev 4R	2X N1	2X N2	2X N3	Mean 2X
	Growth Rate Constant (dilution)	0.019918	0.0215934	0.0188868	0.0218658	0.0200912	0.0157892	0.0244066	0.0172855	0.0205073	0.0200382	0.00255039	0.0246672	0.0268662	0.0296217	0.0291238	0.0217288	0.0191477	0.0325421	0.0178187	0.0214597	0.0247751	0.00509219	0.0368695	0.0393834	0.0304012	0.0353647	0.0328506	0.026456	0.0282917	0.0525112	0.0425244	0.0360725	0.00805851	0.0231049	0.0230281	0.0287613	0.0230281	0.0296217	0.0296217	0.0235764	0.0280626	0.0182888	0.0252326	0.00394008	0.019	0.0165	0.0229	0.0194667
	ND - Below the levels of detected and limit of <1 x 106 applied
	NM - Not measured for validation experiments
[truncated: 1 more columns]
