# Supplementary material for: Experimental and In Silico Modelling Analyses of the Gene Expression Pathway for Recombinant Antibody and By-Product Production in NS0 Cell Lines
Source: PubMed Central journal article supplement (PMC3468484; doi:10.1371/journal.pone.0047422), 2012-10-10
Supplement: pone.0047422.s003.pdf [file pone.0047422.s003.pdf]

Mead *et al.*

# Supplementary file 3

Pathway diagrams and differential equation systems for the different antibody assembly models considered in this study.

In pathway diagrams, productive reactions (leading to secreted full antibody) are shown in red.

# HH model

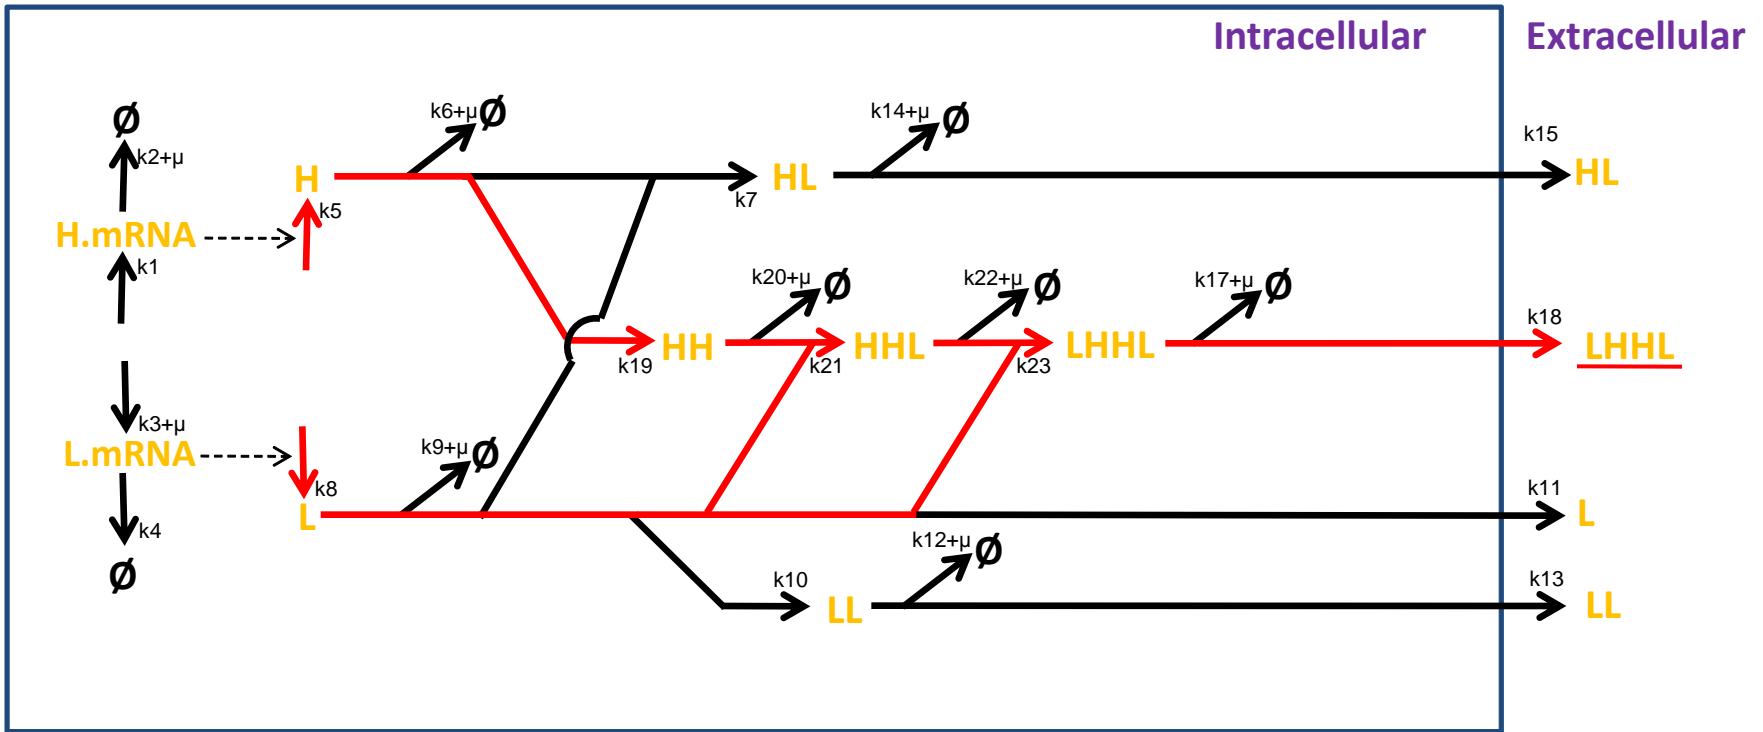

| Species | Name         | Eq.                                                                                        |
|---------|--------------|--------------------------------------------------------------------------------------------|
| S1      | H.RNA        | $dS1/dt = k1 - (k2 + \mu)*S1$                                                              |
| S2      | L.RNA        | $dS2/dt = k3 - (k4 + \mu)*S2$                                                              |
| S3      | H            | $dS3/dt = k5*S1 - (k6 + \mu)*S3 - k19*S3*S3 - k7*S3*S4$                                    |
| S4      | L            | $dS4/dt = k8*S2 - (k9 + \mu)*S4 - k10*S4*S4 - k11*S4 - k21*S10*S4 - k23*S11*S4 - k7*S3*S4$ |
| S5      | L(Medium)    | $dS5/dt = k11*S4$                                                                          |
| S6      | LL           | $dS6/dt = k10*S4*S4 - (k12 + \mu)*S6 - k13*S6$                                             |
| S7      | LL(Medium)   | $dS7/dt = k13*S6$                                                                          |
| S8      | HL           | $dS8/dt = k7*S3*S4 - (k14 + \mu)*S8 - k15*S8$                                              |
| S9      | HL(Medium)   | $dS9/dt = k15 * S8$                                                                        |
| S10     | HH           | $dS10/dt = k19*S3*S3 - (K20 + \mu)*S10 - k21*S10*S4$                                       |
| S11     | LHH          | $dS11/dt = K21*S10*S4 - (k22 + \mu)*S11 - k23*S11*S4$                                      |
| S12     | LHHH         | $dS12/dt = k23*S11*S4 - (k17 + \mu)*S12 - k18*S12$                                         |
| S13     | LHHH(Medium) | $dS13/dt = k18*S12$                                                                        |

# HL model

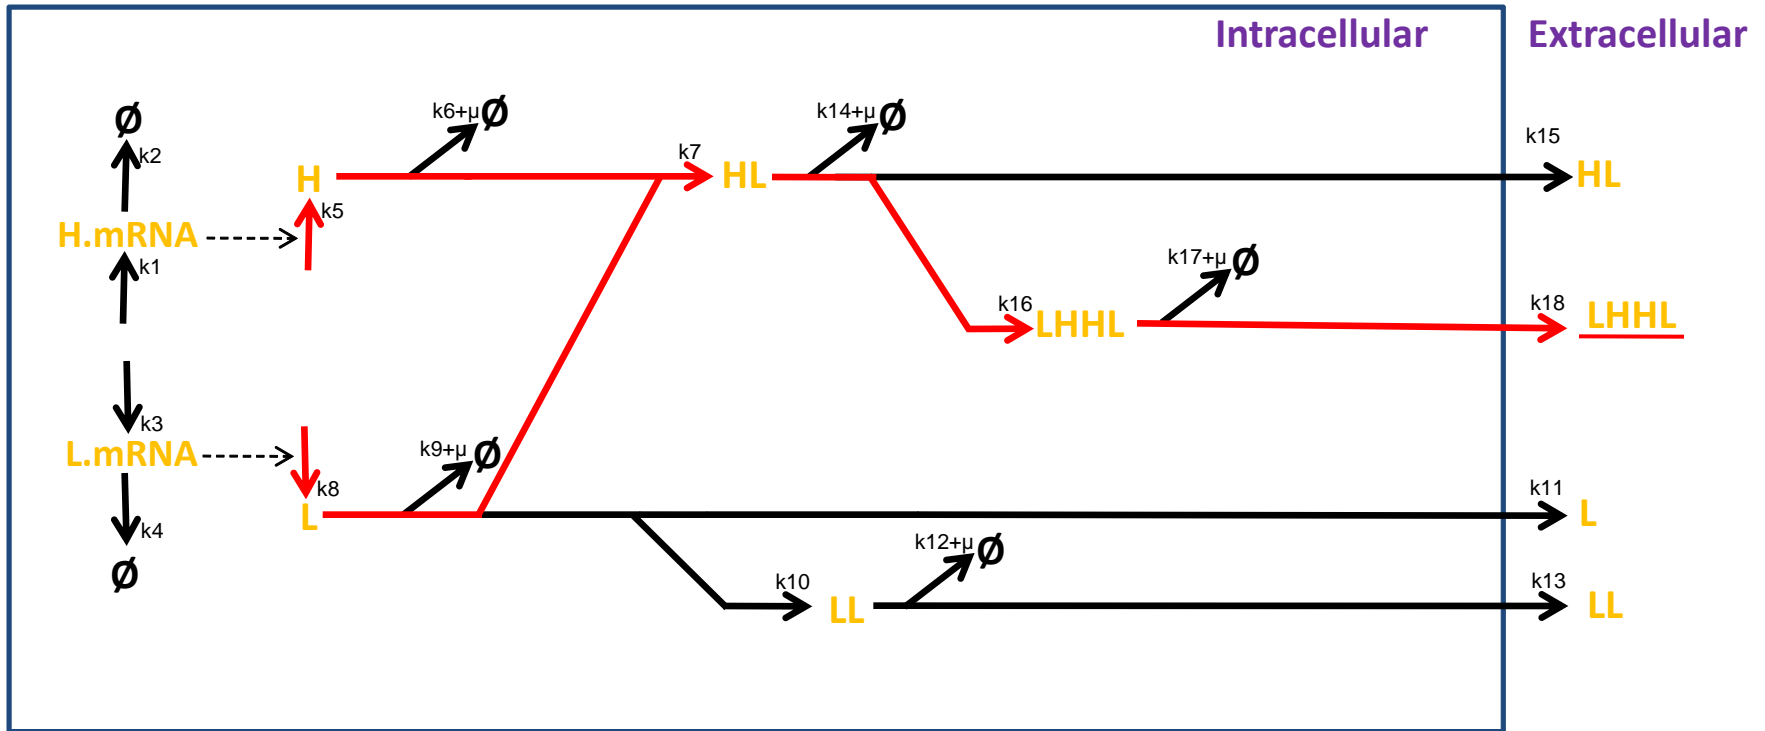

| Species | Name         | Eq.                                                                                     |
|---------|--------------|-----------------------------------------------------------------------------------------|
| S1      | H.RNA        | $dS1/dt = k_1 - (k_2 + \mu) * S1$                                                       |
| S2      | L.RNA        | $dS2/dt = k_3 - (k_4 + \mu) * S2$                                                       |
| S3      | H            | $dS3/dt = k_5 * S1 - (k_6 + \mu) * S3 - k_7 * S3 * S4$                                  |
| S4      | L            | $dS4/dt = k_8 * S2 - (k_9 + \mu) * S4 - k_7 * S3 * S4 - k_{10} * S4 * S4 - k_{11} * S4$ |
| S5      | L(Medium)    | $dS5/dt = k_{11} * S4$                                                                  |
| S6      | LL           | $dS6/dt = k_{10} * S4 * S4 - (k_{12} + \mu) * S6 - k_{13} * S6$                         |
| S7      | LL(Medium)   | $dS7/dt = k_{13} * S6$                                                                  |
| S8      | HL           | $dS8/dt = k_7 * S3 * S4 - (k_{14} + \mu) * S8 - k_{15} * S8 - k_{16} * S8 * S8$         |
| S9      | HL(Medium)   | $dS9/dt = k_{15} * S8$                                                                  |
| S12     | LHHL         | $dS12/dt = k_{16} * S8 * S8 - (k_{17} + \mu) * S12 - k_{18} * S12$                      |
| S13     | LHHL(Medium) | $dS13/dt = k_{18} * S12$                                                                |

# combined model

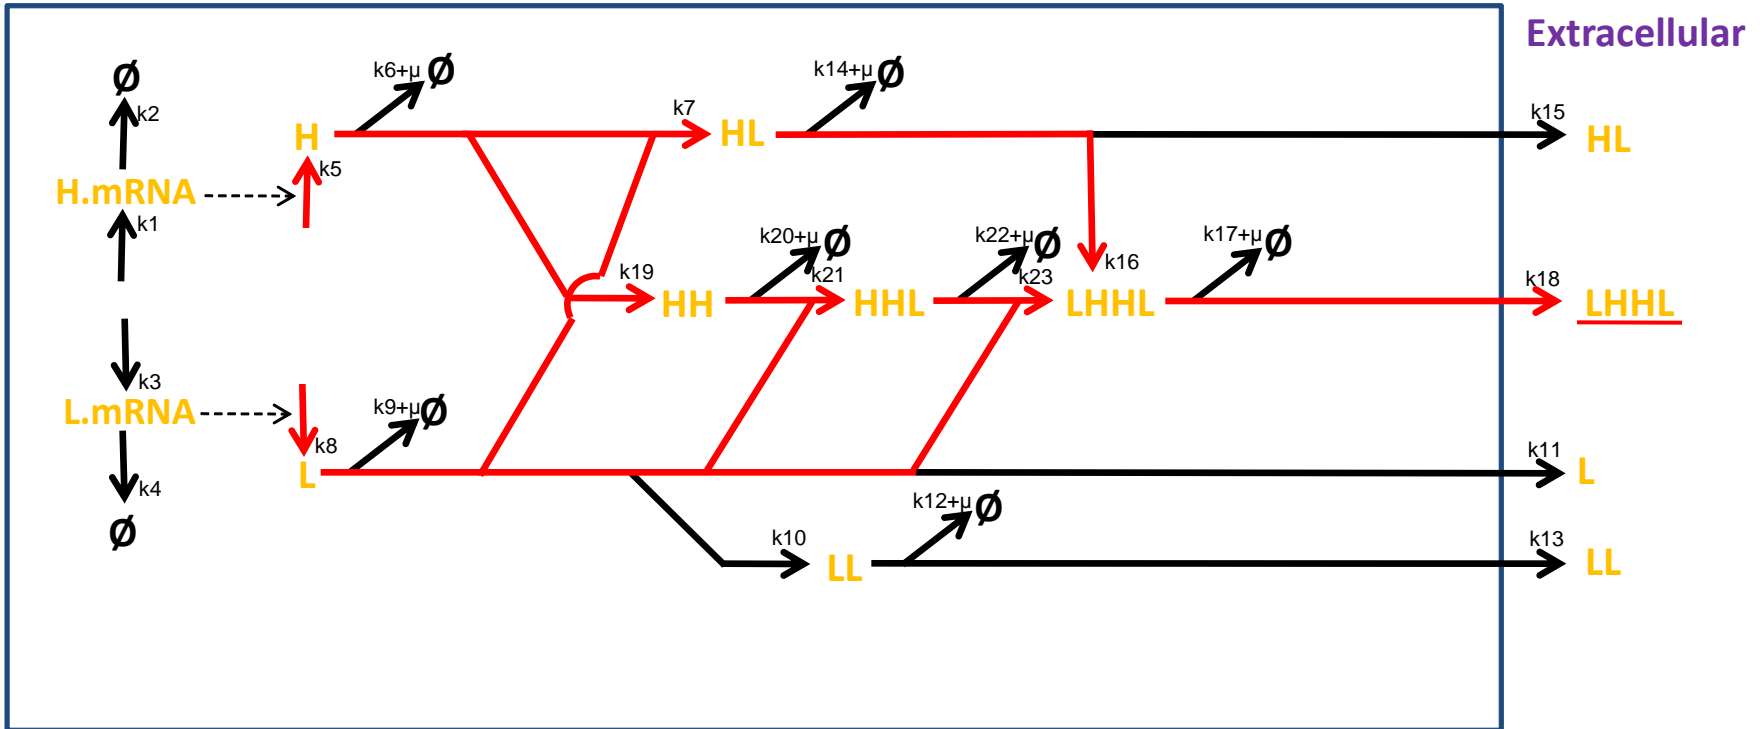

| Species | Name         | Eq.                                                                                                                                   |
|---------|--------------|---------------------------------------------------------------------------------------------------------------------------------------|
| S1      | H.RNA        | $dS1/dt = k_1 - (k_2 + \mu) * S1$                                                                                                     |
| S2      | L.RNA        | $dS2/dt = k_3 - (k_4 + \mu) * S2$                                                                                                     |
| S3      | H            | $dS3/dt = k_5 * S1 - (k_6 + \mu) * S3 - k_7 * S3 * S4 - k_{19} * S3 * S3$                                                             |
| S4      | L            | $dS4/dt = k_8 * S2 - (k_9 + \mu) * S4 - k_7 * S3 * S4 - k_{10} * S4 * S4 - k_{11} * S4 - k_{21} * S_{10} * S4 - k_{23} * S_{11} * S4$ |
| S5      | L(Medium)    | $dS5/dt = k_{11} * S4$                                                                                                                |
| S6      | LL           | $dS6/dt = k_{10} * S4 * S4 - (k_{12} + \mu) * S6 - k_{13} * S6$                                                                       |
| S7      | LL(Medium)   | $dS7/dt = k_{13} * S6$                                                                                                                |
| S8      | HL           | $dS8/dt = k_7 * S3 * S4 - (k_{14} + \mu) * S8 - k_{16} * S8 * S8 - k_{15} * S8$                                                       |
| S9      | HL(Medium)   | $dS9/dt = k_{15} * S8$                                                                                                                |
| S10     | HH           | $dS10/dt = k_{19} * S3 * S3 - (k_{20} + \mu) * S_{10} - k_{21} * S_{10} * S4$                                                         |
| S11     | LHH          | $dS11/dt = k_{21} * S_{10} * S4 - (k_{22} + \mu) * S_{11} - k_{23} * S_{11} * S4$                                                     |
| S12     | LHHL         | $dS12/dt = k_{23} * S_{11} * S4 + k_{16} * S8 * S8 - (k_{17} + \mu) * S_{12} - k_{18} * S_{12}$                                       |
| S13     | LHHL(Medium) | $dS13/dt = k_{18} * S_{12}$                                                                                                           |

# James model

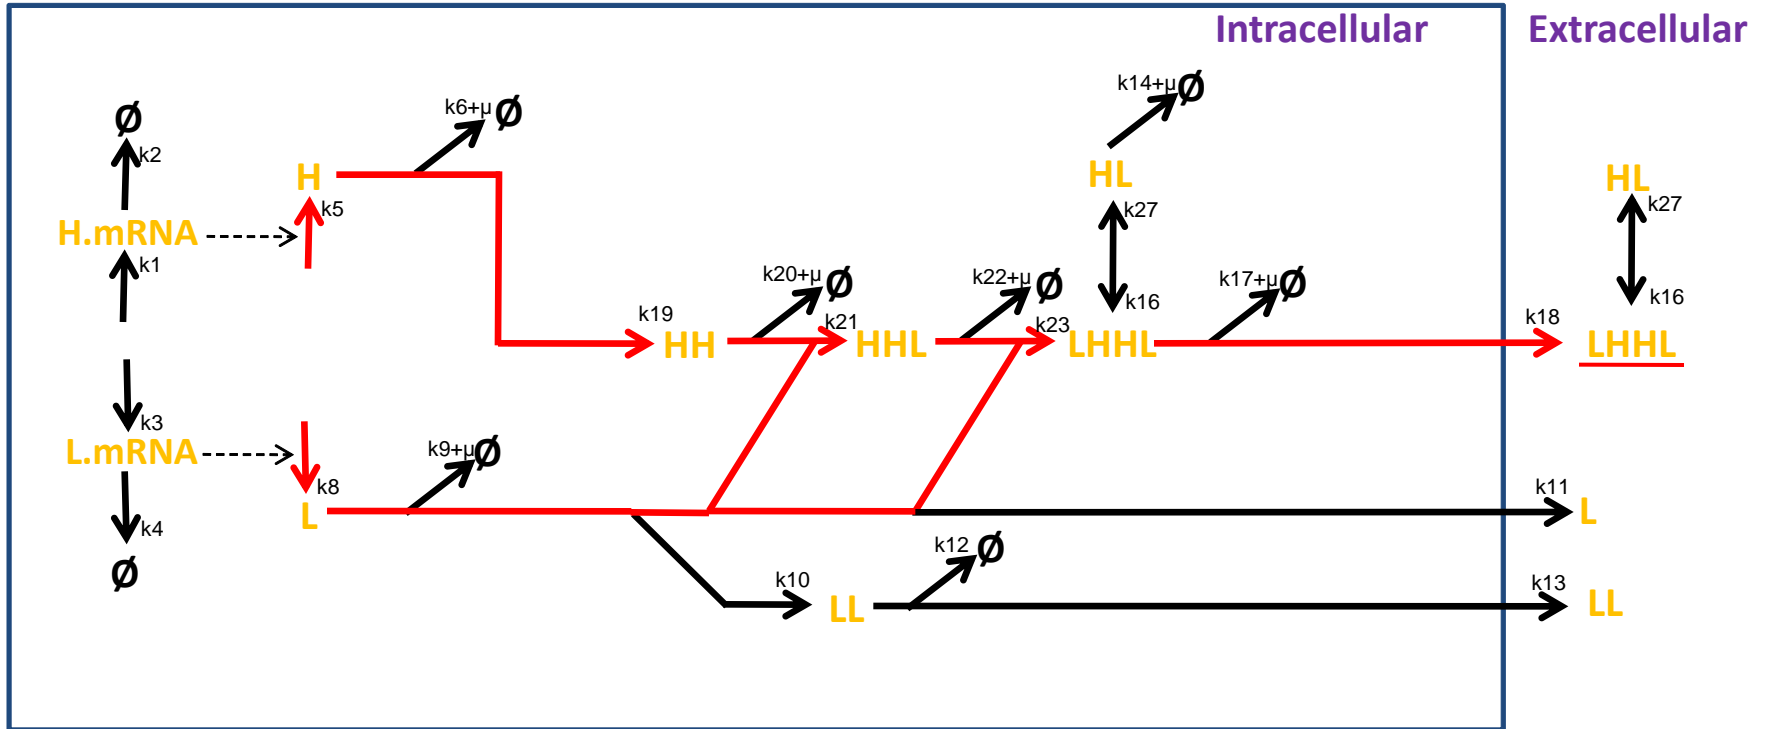

| Species | Name         | Eq.                                                                                         |
|---------|--------------|---------------------------------------------------------------------------------------------|
| S1      | H.RNA        | $dS1/dt = k_1 - (k_2+\mu)*S1$                                                               |
| S2      | L.RNA        | $dS2/dt = k_3 - (k_4+\mu)*S2$                                                               |
| S3      | H            | $dS3/dt = k_5*S1 - (k_6+\mu)*S3 - k_{19}*S3*S3$                                             |
| S4      | L            | $dS4/dt = k_8*S2 - (k_9+\mu)*S4 - k_{10}*S4*S4 - k_{11}*S4 - k_{21}*S10*S4 - k_{23}*S11*S4$ |
| S5      | L(Medium)    | $dS5/dt = k_{11}*S4$                                                                        |
| S6      | LL           | $dS6/dt = k_{10}*S4*S4 - (k_{12}+\mu)*S6 - k_{13}*S6$                                       |
| S7      | LL(Medium)   | $dS7/dt = k_{13}*S6$                                                                        |
| S8      | HL           | $dS8/dt = k_{27}*S12 - (k_{14}+\mu)*S8 - k_{16}*S8*S8$                                      |
| S9      | HL(Medium)   | $dS9/dt = k_{27}*S13 - k_{16}*S9*S9$                                                        |
| S10     | HH           | $dS10/dt = k_{19}*S3*S3 - (k_{20}+\mu)*S10 - k_{21}*S10*S4$                                 |
| S11     | LHH          | $dS11/dt = k_{21}*S10*S4 - (k_{22}+\mu)*S11 - k_{23}*S11*S4$                                |
| S12     | LHHL         | $dS12/dt = k_{23}*S11*S4 + k_{16}*S9*S9 - (k_{17}+\mu)*S12 - k_{18}*S12 - k_{27}*S12$       |
| S13     | LHHL(Medium) | $dS13/dt = k_{18}*S12 - k_{27}*S13$                                                         |

# Nomenclature

## Rate constants:

|       | type          | description                | unit                            |
|-------|---------------|----------------------------|---------------------------------|
| $\mu$ | rate constant | cell growth rate           | $h^{-1}$                        |
| k1    | rate          | H.RNA transcription        | mRNAs $h^{-1}$                  |
| k2    | rate constant | H.RNA turnover             | $h^{-1}$                        |
| k3    | rate          | L.RNA transcription        | mRNAs $h^{-1}$                  |
| k4    | rate constant | L.RNA turnover             | $h^{-1}$                        |
| k5    | rate constant | H translation              | molecules mRNA $^{-1}$ $h^{-1}$ |
| k6    | rate constant | H turnover                 | $h^{-1}$                        |
| k7    | rate constant | H + L $\rightarrow$ HL     | molecule $^{-1}$ $h^{-1}$       |
| k8    | rate constant | L translation              | molecules mRNA $^{-1}$ $h^{-1}$ |
| k9    | rate constant | L turnover                 | $h^{-1}$                        |
| k10   | rate constant | L + L $\rightarrow$ LL     | molecule $^{-1}$ $h^{-1}$       |
| k11   | rate constant | L export                   | $h^{-1}$                        |
| k12   | rate constant | LL turnover                | $h^{-1}$                        |
| k13   | rate constant | LL export                  | $h^{-1}$                        |
| k14   | rate constant | HL turnover                | $h^{-1}$                        |
| k15   | rate constant | HL export                  | $h^{-1}$                        |
| k16   | rate constant | HL + HL $\rightarrow$ LHHL | molecule $^{-1}$ $h^{-1}$       |
| k17   | rate constant | LHHL turnover              | $h^{-1}$                        |
| k18   | rate constant | LHHL export                | $h^{-1}$                        |
| k19   | rate constant | H + H $\rightarrow$ HH     | molecule $^{-1}$ $h^{-1}$       |
| k20   | rate constant | HH turnover                | $h^{-1}$                        |
| k21   | rate constant | HH + L $\rightarrow$ LHH   | molecule $^{-1}$ $h^{-1}$       |
| k22   | rate constant | LHH turnover               | $h^{-1}$                        |
| k23   | rate constant | LHH + L $\rightarrow$ LHHL | molecule $^{-1}$ $h^{-1}$       |
| k27   | rate constant | LHHL $\rightarrow$ HL+HL   | $h^{-1}$                        |
| k28   | rate constant | HL + HL $\rightarrow$ LHHL | molecule $^{-1}$ $h^{-1}$       |

## Species

|     |               |
|-----|---------------|
| S1  | H.mRNA        |
| S2  | L.mRNA        |
| S3  | H             |
| S4  | L             |
| S5  | L(Medium)     |
| S6  | LL            |
| S7  | LL(Medium)    |
| S8  | HL            |
| S9  | HL(Medium)    |
| S10 | HH            |
| S11 | LHH           |
| S12 | LHHL          |
| S13 | LHHL(Medium)  |
| S14 | LH:HL         |
| S15 | LH:HL(Medium) |
